1           **Raising the stakes: Loss of efflux-pump regulation decreases meropenem**  
2                                   **susceptibility in *Burkholderia pseudomallei***

3

4   Derek S. Sarovich<sup>1,2\*</sup>, Jessica R. Webb<sup>1</sup>, Matthew C. Pitman<sup>3</sup>, Linda T. Viberg<sup>1</sup>, Mark  
5   Mayo<sup>1</sup>, Robert W. Baird<sup>3</sup>, Jennifer M. Robson<sup>4</sup>, Bart J. Currie<sup>1,3</sup> and Erin P. Price<sup>1,2</sup>

6

7   <sup>1</sup>Global and Tropical Health Division, Menzies School of Health Research, Tiwi, Northern  
8   Territory, 0810, Australia;

9   <sup>2</sup>Faculty of Science, Health, Education and Engineering, University of the Sunshine Coast,  
10   Sippy Downs, Queensland, 4556, Australia;

11   <sup>3</sup>Departments of Infectious Diseases and Pathology and Northern Territory Medical  
12   Program, Royal Darwin Hospital, Tiwi, Northern Territory, 0810, Australia;

13   <sup>4</sup>Sullivan Nicolaidis Pathology, Bowen Hills, Queensland, 4006, Australia.

14

15   \*Corresponding author information:

16   Derek S. Sarovich, PhD

17   University of the Sunshine Coast, Locked Bag 4, Maroochydore DC, Queensland, 4558,  
18   Australia

19   Ph: +61 7 5456 3748

20   E-mail: [dsarovich@usc.edu.au](mailto:dsarovich@usc.edu.au)

21

22   Classification: BIOLOGICAL SCIENCES: Microbiology

23   Short title: Meropenem resistance in *B. pseudomallei*

24

25   Keywords: *Burkholderia pseudomallei*, carbapenem, meropenem, antibiotic resistance,  
26   decreased susceptibility, genomics, RND efflux pump, AmrR

27

## 28 **Abstract**

29 *Burkholderia pseudomallei*, the causative agent of the high-mortality disease melioidosis,  
30 is a Gram-negative bacterium that is naturally resistant to many antibiotics. There is no  
31 vaccine for melioidosis, and effective eradication is reliant on biphasic and prolonged  
32 antibiotic administration. The carbapenem drug, meropenem, is the current gold-  
33 standard option for treating severe melioidosis. Intrinsic *B. pseudomallei* resistance  
34 towards meropenem has not yet been documented; however, resistance could  
35 conceivably develop over the course of infection, leading to prolonged sepsis and  
36 treatment failure. Here, we document 11 melioidosis cases in which *B. pseudomallei*  
37 isolates developed decreased susceptibility towards meropenem during treatment,  
38 including two cases not treated with this antibiotic. Meropenem minimum inhibitory  
39 concentrations increased over time from 0.5-0.75 to 3-8 µg/mL. Using comparative  
40 genomics, we identified multiple mutations affecting multidrug resistance-nodulation-  
41 division (RND) efflux pump regulators, leading to over-expression of their corresponding  
42 pumps. The most commonly affected pump was AmrAB-OprA, although alterations in the  
43 local regulators of BpeEF-OprC or BpeAB-OprB were observed in three cases. This study  
44 confirms the role of RND efflux pumps in decreased meropenem susceptibility in *B.*  
45 *pseudomallei*. Further, we document two concerning examples of severe melioidosis  
46 where the reduced treatment efficacy of meropenem was associated with a fatal  
47 outcome.

48

49

## 50 **Significance Statement**

51 The bacterium *Burkholderia pseudomallei*, which causes the often-fatal tropical disease  
52 melioidosis, is difficult to eradicate. Due to high levels of intrinsic antibiotic resistance,  
53 only a handful of antibiotics are effective against this pathogen. One of these,  
54 meropenem, is commonly used in the treatment of melioidosis patients who are  
55 unresponsive to other treatments or are critically ill. Here, we describe 11 melioidosis  
56 cases whereby patients exhibited prolonged or repeated infections that were associated  
57 with the development of decreased meropenem susceptibility. We identified the  
58 molecular basis for this decreased susceptibility in latter *B. pseudomallei* isolates  
59 obtained from these patients, and functionally confirmed the mechanism conferring this  
60 phenotype. Our findings have important ramifications for the diagnosis, treatment and  
61 management of life-threatening melioidosis cases.

62

63

## 64 **Introduction**

65 *Burkholderia pseudomallei* is the causative agent of the potentially deadly disease  
66 melioidosis, and is one of the most intrinsically drug-resistant bacterial pathogens (1).  
67 As there is currently no effective vaccine for melioidosis, eradication relies on a lengthy  
68 antibiotic regimen (2, 3). Even with appropriate antibiotics, rapid diagnosis and high  
69 standards of healthcare, case fatality rates remain at 10% in northern Australia and 40%  
70 in Southeast Asia (4, 5), the two regions with the highest reported melioidosis rates (6,  
71 7). *B. pseudomallei* is a significant yet underreported cause of morbidity and mortality in  
72 tropical and subtropical regions, with recent modeling suggesting that the global  
73 melioidosis mortality rate may be similar to that of measles at ~89,000 deaths per year  
74 and substantially higher than that from dengue (7).

75 Melioidosis treatment is biphasic, comprising an initial intensive intravenous (IV) phase  
76 of a minimum of 10-14 days, followed by a prolonged oral eradication phase lasting up  
77 to six months. The third-generation cephalosporin antibiotic, ceftazidime, is generally  
78 used preferentially in the IV phase. The carbapenems imipenem and meropenem have  
79 the lowest minimum inhibitory concentrations (MICs) against *B. pseudomallei*, and *in*  
80 *vitro* time-kill studies have shown that carbapenems perform better against *B.*  
81 *pseudomallei* than ceftazidime (8, 9). Meropenem is recommended for patients who  
82 present with life-threatening sepsis requiring intensive care therapy, although there is no  
83 clinical evidence that ceftazidime is inferior to meropenem for patients with melioidosis  
84 who are not critically ill and ceftazidime remains the drug of choice for initial therapy (2,  
85 3). Importantly, primary resistance towards meropenem has not yet been documented.  
86 During the eradication phase of treatment, the preferred treatment is trimethoprim-  
87 sulfamethoxazole (TMP/SMX), with amoxicillin-clavulanate or doxycycline used as  
88 alternatives when required.

89 Due to limited treatment options, the emergence of antibiotic resistance during infection,  
90 although rare, is a significant event that can lead to treatment failure and subsequent  
91 patient death. Unlike many other infectious diseases, melioidosis is largely non-  
92 communicable, with almost all infections acquired following contact with *B.*  
93 *pseudomallei*-contaminated soil or water (1). As a result, resistance or decreased  
94 susceptibility to clinically-relevant antibiotics emerges as an independent event during  
95 treatment rather than by environmental influences or transmission of an antibiotic-  
96 resistant strain from another individual or animal (10).

97 The mechanisms that *B. pseudomallei* evolves to evade antibiotics during an infection  
98 are myriad and multifactorial. Unlike many other species, all mechanisms occur as  
99 chromosomal alterations; acquisition of extrachromosomal elements containing antibiotic  
100 resistance genes has not yet been documented in *B. pseudomallei*. Resistance to  
101 ceftazidime can occur by up-regulation or alteration of the  $\beta$ -lactamase PenA (encoded  
102 by *penA*; (11-16)) or via the loss of penicillin-binding protein 3 (17). Point mutations in  
103 *penA* have recently been shown to lead to imipenem resistance, a carbapenem drug  
104 similar to meropenem (18), and missense and promoter mutations affecting *penA* confer  
105 resistance towards amoxicillin-clavulanate (12, 15). Up-regulation of multi-drug efflux  
106 pumps can also contribute to antibiotic resistance in *B. pseudomallei*. There are three  
107 characterized pumps known to confer resistance (AmrAB-OprA, BpeEF-OprC or BpeAB-  
108 OprB) and up-regulation of one or more of these pumps in combination with mutations in  
109 methylation or metabolism pathways lead to doxycycline or TMP/SMX resistance,  
110 respectively (14, 19, 20).

111 We have recently sequenced to closure, or close-to-closure, isogenic *B. pseudomallei*  
112 strain pairs from three melioidosis cases where decreased susceptibility towards  
113 meropenem was observed (21). In the current study, we identified the mutations leading  
114 to decreased meropenem susceptibility in these pairs using whole-genome sequencing  
115 (WGS) and comparative genomics and functionally characterized the mechanism using  
116 allelic exchange and quantitative reverse transcription PCR (RT-qPCR). We then reviewed  
117 ~1,000 melioidosis cases enrolled in the Darwin Prospective Melioidosis Study (DPMS)  
118 (5), an ongoing study that has documented all cases in the endemic "Top End" region of  
119 the Northern Territory, Australia, since October 1989. The intent was to identify DPMS  
120 patients who experienced difficulties in clearing their infections, pointing towards the  
121 possible emergence of *B. pseudomallei* strains with decreased meropenem susceptibility.  
122 Patients included those with persistent culture positivity or with repeated recrudescent or  
123 relapsing infections, irrespective of whether they were treated with meropenem. Where  
124 available, longitudinal isolates were examined to identify the emergence of decreased  
125 meropenem susceptibility over time. In all cases where decreased susceptibility was  
126 observed, we used comparative genomics to identify the mechanisms underpinning this  
127 altered phenotype.

128

129

## 130 Results

131 **Isolates with decreased meropenem susceptibilities have an altered AmrR**  
132 **efflux pump regulator.** We have recently identified three DPMS patients (P608, P726  
133 and P797) with severe melioidosis and prolonged blood culture-positivity who harbored  
134 *B. pseudomallei* strains exhibiting decreased meropenem susceptibility following  
135 meropenem treatment (21). The treatment and admission history for these patients is  
136 detailed in Figure S1. P608, P726 and P797 were repeatedly, but not continuously,  
137 blood-culture positive for 64, 89, and 454 days, respectively. P726 and P797 ultimately  
138 died whereas P608 eventually cleared their infection. The difficulty in eradicating these  
139 infections despite prolonged and aggressive antibiotic therapy prompted us to  
140 investigate *B. pseudomallei* MICs to the clinically relevant antibiotics amoxicillin-  
141 clavulanate, ceftazidime, doxycycline, meropenem and TMP/SMX. All initial isolates were  
142 sensitive to meropenem (MICs = 0.5-0.75 µg/mL) whereas the latter isolates had  
143 increased MICs that ranged from 3 to 8 µg/mL (Figure 1; Table 1). P608 and P797  
144 isolates had also developed resistance towards TMP/SMX at 24/456 and 4/76 µg/mL,  
145 respectively. All isolates remained sensitive to amoxicillin-clavulanate, ceftazidime and  
146 doxycycline.

147 For all three cases, high-quality closed or close-to-closed assemblies of the isogenic  
148 strain pairs (21) enabled comprehensive identification of all genetic variants between the  
149 pairs (Table S1). A single gene, *amrR*, was mutated in all three latter isolates but not in  
150 the original isolates (Figure 2; Table 2; Table S1). AmrR is the local TetR-type regulator  
151 of the resistance-nodulation-division (RND) efflux pump AmrAB-OprA, which is  
152 responsible for intrinsic aminoglycoside and macrolide resistance in *B. pseudomallei*  
153 (22). The latter P608 isolate encodes an in-frame deletion of four amino acids  
154 (Ala153\_Asp156del). Similarly, the latter P726 isolate possesses an in-frame deletion of  
155 three amino acids (Val60\_Cys63del), and two latter isolates from P797 encode a  
156 missense SNP that results in a Gly30Asp substitution. No structural alterations, large  
157 deletions or duplications were observed in the strain pairs, thereby ruling out other  
158 genetic variants in conferring decreased meropenem susceptibility.

159 **Functional characterization using scar-less knockouts and RT-qPCR verifies the**  
160 **role of *amrR* in upregulation of the RND efflux pump AmrAB-OprA.** Scar-less  
161 *amrR* gene knockouts were created from two mutant isolates (MSHR4083; P608 and  
162 MSHR6755; P726) and one wild-type control strain (MSHR5864; P726). Removal of  
163 *amrR* from the three strains led to an MIC value of 3 µg/mL, regardless of the parental  
164 strain's MIC. We then attempted *in trans* complementation with wild-type *amrR* using  
165 the pMo168 expression vector (23); however, due to these strains possessing very high

166 kanamycin resistance following *amrR* removal, sufficient selective pressure needed to  
167 maintain pMo168 was not possible.

168 RT-qPCR was employed to determine whether *amrB* was upregulated in the strains  
169 exhibiting decreased meropenem susceptibility compared with their wild-type isogenic  
170 counterparts. Strains MSHR4083, MSHR3763, MSHR5864, MSHR6755, and their  
171 corresponding *amrR* knockouts (where available) were tested for increased *amrB*  
172 expression both with and without the presence of meropenem. For the wild-type strains,  
173 *amrB* expression was barely detectable regardless of meropenem presence or absence.  
174 All other strains with altered or deleted *amrR* showed significant up-regulation of *amrB*  
175 (range: 10 to 30-fold) in the presence of sub-inhibitory (0.25µg/mL) concentrations of  
176 meropenem, but no significant increased expression in the absence of meropenem.

177 **Additional strains with increased meropenem MICs also exhibit *amrR***  
178 **mutations.** Almost all primary isolates retrieved from the DPMS cohort have previously  
179 been screened for antibiotic resistance towards the clinically relevant drugs used in  
180 treatment (24). Latter strains from DPMS cases have generally only had repeat  
181 sensitivity testing if there has been a slow clinical response or recrudescence infection  
182 confirmed by culture (25). Through this testing, we identified a further four DPMS  
183 patients (P179, P215, P337, P989) harboring isolates that had developed elevated  
184 meropenem MICs over time. We also examined *B. pseudomallei* isolates obtained from  
185 four non-DPMS cases: two were cystic fibrosis (CF) patients with melioidosis with  
186 previously documented elevated meropenem MICs (14), case Pre-DPMS 89 was infected  
187 prior to the commencement of the DPMS, and case QP09 was from a different study site.

188 Comparative genomic analysis identified that, in all but two cases, isolates with  
189 decreased meropenem susceptibility encoded missense, frameshift or nonsense  
190 mutations in *amrR* (Figure 2, Table 2, Text S1 and Table S1). Curiously, two strains with  
191 decreased meropenem susceptibility were retrieved from P179, yet only one  
192 (MSHR0678) possessed an *amrR* mutation. The other strain, MSHR0800, instead  
193 encoded a frameshift mutation in the LysR-type regulator *bpeR* (*BPSL0812*; L85fs), the  
194 local transcriptional regulator of the BpeAB-OprB RND efflux pump (Table 2). A whole-  
195 genome SNP and indel phylogeny was constructed from all six isolates available from  
196 this patient and showed that these strains developed decreased meropenem  
197 susceptibility independently (Figure S1). A mutated *bpeR* was also observed in  
198 MSHR0937 from P215 (D176A), which otherwise did not have any mutations that could  
199 be linked to its decreased meropenem susceptibility (Table 2 and Text S1). In addition to  
200 having a truncated *amrR* (K13fs), MSHR1300 (P337) encoded a missense mutation in  
201 *bpeT* (*BPSS0290*; S311R), the local LysR-type regulator of the BpeEF-OprC RND-efflux

202 pump. Interestingly, the latter isolate from P989 was a 66%/33% mixture of two strains  
203 that contained two independent mutations in *amrR*, a S166P substitution and A145  
204 frameshift (Table 2, Figure S2 and Text S1).

205 **Resistance towards other antibiotics in strains with decreased meropenem**  
206 **susceptibility.** MIC determination of other clinically-relevant antibiotics identified  
207 multidrug resistance development in eight of the 11 cases, with acquired resistance or  
208 decreased susceptibility towards ceftazidime, TMP/SMX, amoxicillin-clavulanate or  
209 doxycycline having emerged in the latter strains (Table 1).

210 The most common co-resistance was towards TMP/SMX, which occurred in four cases.  
211 The latter isolates from P608, P797, CF9 and CF11 had elevated TMP/SMX MICs of 24, 4,  
212  $\geq 32$  and  $\geq 32$   $\mu\text{g/mL}$ , respectively, compared with parental MICs of 0.25-1  $\mu\text{g/mL}$ . In the  
213 P608 mutant, a missense SNP affected *dut* (*BPSL0903*; also known as *dnaS*). This gene  
214 encodes for deoxyuridine 5'-triphosphate nucleotidohydrolase, an enzyme involved in  
215 pyrimidine metabolism. Although functionally determining the impact of this mutation  
216 was beyond the scope of this study, the Gly91Ala substitution likely contributes to high-  
217 level TMP/SMX resistance in this isolate as no additional mutations separated this  
218 isogenic pair. The P797 mutant encoded an in-frame deletion (Asp110\_Gly116del) in a  
219 putative phosphoesterase (*BPSL2263*); this mutation was not present in the TMP/SMX-  
220 sensitive initial and midpoint isolates and was the only coding mutation that separated  
221 the latter and midpoint strains (Table S1). TMP/SMX resistance was also observed in  
222 both CF cases (14, 20). In CF11 ( $\geq 32$   $\mu\text{g/mL}$ ), TMP/SMX resistance is most likely  
223 conferred by missense mutations affecting Ptr1 (R20-A22 insertion) and BpeS (the co-  
224 regulator of BpeEF-OprC; V40I and R247L). The mechanism of TMP/SMX resistance in  
225 CF9 is not yet known, but may be attributed to missense SNPs in *dut* (N99S) or *metF*  
226 (N162P) (14) (Text S1).

227 Doxycycline resistance was observed in the *amrR* mutants from Pre-DPMS 89 and CF9  
228 (48  $\mu\text{g/mL}$ ). We have recently shown that mutations affecting both AmrR and the SAM-  
229 dependent methyltransferase BPSL3085 lead to doxycycline resistance (26). Consistent  
230 with this prior work, the *amrR*-mutated strain from CF9 encodes a frameshift in  
231 *BPSL3085*, and in Pre-DPMS 89, two missense mutations affect this gene (Text S1).  
232 Strains from Pre-DPMS 89 and P215 also encode a PenA T147A variant, previously  
233 associated with high-level imipenem (32  $\mu\text{g/mL}$ ) and amoxicillin-clavulanate (32  $\mu\text{g/mL}$ )  
234 resistance in the clinical *B. pseudomallei* strain, Bp1651 (18); however, despite encoding  
235 for this variant, all three strains (MSHR0052, MSHR0664 and MSHR0937) remained  
236 sensitive to imipenem (MICs = 0.5 $\mu\text{g/mL}$ ), indicating that this mutation by itself does  
237 not confer imipenem resistance. It is possible that other mutations within *penA* are

238 required to confer the high-level imipenem resistance phenotype observed previously  
239 (18). Interestingly, meropenem MICs showed no correlation with imipenem MICs,  
240 suggesting different pharmacodynamics of these two carbapenems in *B. pseudomallei*.

241 Decreased susceptibility towards ceftazidime was seen in P215 and CF11 (8-12 µg/mL),  
242 and high-level resistance ( $\geq 256$  µg/mL) has previously been described in P337. A 10x  
243 duplication of a 36.7kb region encompassing *penA* (14), and a PenA C69Y mutant (12),  
244 are responsible for the elevated ceftazidime MICs in CF11 and P337, respectively. The  
245 molecular basis for decreased ceftazidime susceptibility in P215 is not yet known,  
246 although altered *penA* copy number and missense or promoter mutations can be ruled  
247 out, as can mutations in penicillin-binding protein 3 (*BPSS1219*). Based on genome  
248 comparison of the isogenic P215 pair, we propose that a deleterious frameshift mutation  
249 in *spoT*, the enzyme responsible for ppGpp metabolism (27), may sufficiently alter  
250 growth kinetics of the latter P215 strain, leading to CAZ resistance (Table S1).



## 251 Discussion

252 Meropenem is a valuable antibiotic in the treatment of melioidosis, particularly for  
253 critically ill cases that require intensive care (28). The importance of meropenem is  
254 conferred in part by the fact that no primary resistance towards this antibiotic has ever  
255 been reported in *B. pseudomallei* (24). However, we have recently documented three  
256 cases whereby patients had extended and repeated episodes of blood culture positivity  
257 despite aggressive treatment with several rounds of antibiotics, including meropenem. A  
258 complicating feature of treatment was that the patients self-discharged from hospital  
259 multiple times, which greatly shortened their intended initial intravenous antibiotic  
260 regimens, based on the Royal Darwin Hospital melioidosis treatment duration protocol  
261 (29). All subsequently had difficulty clearing their *B. pseudomallei* infections and in two  
262 cases, they ultimately succumbed to their disease. Alarming, all were infected with *B.*  
263 *pseudomallei* strains that developed reduced sensitivity towards meropenem over the  
264 course of their treatment (MIC=3-8 cf. 0.5-0.75 µg/mL) (21).

265 Here, we expand upon this work by identifying and functionally characterizing the  
266 molecular basis for decreased meropenem susceptibility in *B. pseudomallei* isolates  
267 retrieved from 11 Australian melioidosis cases. In addition to the three previously  
268 reported cases, five new cases that were refractory to treatment were identified  
269 following a comprehensive review of ~1,000 patients enrolled in the DPMS, an ongoing  
270 study of melioidosis cases in the Northern Territory, Australia (5). Three additional cases  
271 not enrolled in the DPMS were also identified. A focus was placed on those patients with  
272 persistent culture positivity, or recrudescence or relapsing infections, and where  
273 longitudinal isolates were available for MIC testing and WGS. The eleven cases span 26  
274 years and represent melioidosis patients living in two Australian states. The mutated  
275 strains were unrelated according to phylogenomic analysis (results not shown),  
276 demonstrating that the decreased meropenem susceptibility phenotype can potentially  
277 arise in any *B. pseudomallei* isolate given the right selective pressures.

278 Using a comparative genomics approach, we catalogued all genome-wide alterations (i.e.  
279 SNPs, small indels, duplications and larger deletions) separating the initial susceptible  
280 isolates from their mutated counterparts. Remarkably, isolates with decreased  
281 meropenem susceptibility from 10 of the 11 cases had accrued non-synonymous  
282 mutations within a single gene, *amrR*, which encodes AmrR, the TetR-type regulator of  
283 RND efflux pump AmrAB-OprA. In the remaining case, we observed an alteration in  
284 *bpeR*, the LysR-type regulator of the RND efflux pump BpeAB-OprB; this mutation was  
285 also observed in one of two isolates retrieved from P179 that encoded no mutations in  
286 *amrR* yet exhibited decreased meropenem susceptibility. One other patient, P337,

287 harbored an isolate (MSHR1300) that, in addition to having a mutated *amrR*, encoded an  
288 altered *bpeT*, the LysR-type regulator of the RND efflux pump BpeEF-OprC. These results  
289 show that mutations affecting RND efflux pump regulation, and particularly AmrAB-OprA,  
290 cause increased MICs towards meropenem. Our findings provide a striking example of  
291 the value of comparative genomics in identifying the molecular basis for decreased  
292 antibiotic susceptibility and the contribution of convergent evolution in conferring a given  
293 phenotype.

294 To understand the link between RND efflux pump dysregulation and decreased  
295 meropenem susceptibility, we compared *amrB* expression levels in mutated and wild-  
296 type strains. The dramatic upregulation of *amrB* in the presence of meropenem and in  
297 the absence of a functional *amrR* (~10 to ~30-fold increase) is consistent with the  
298 regulatory role of AmrR on AmrAB-OprA, and our results show that meropenem probably  
299 acts as a substrate for efflux by this efflux pump. A similar phenomenon has also been  
300 documented in other Gram-negative pathogens. In *Pseudomonas aeruginosa* (30-32)  
301 and *Acinetobacter baumannii* (33, 34), over-expression of the MexAB-OprM and AdeABC  
302 efflux pumps, respectively, lead to decreased meropenem sensitivity although not high-  
303 level resistance. These studies also found that dysregulation of other efflux pump  
304 regulators can contribute to decreased meropenem susceptibility by increasing the  
305 expression of the other RND efflux pumps. Specifically, we observed three isolates with  
306 mutations in other efflux pump regulators (*bpeT* in MSHR1300 and *bpeR* in MSHR0800  
307 and MSHR0937). Hayden and co-workers also identified a mutation within *bpeT* in *B.*  
308 *pseudomallei* 354e due to an 800kb inversion, increasing the meropenem MIC for this  
309 isolate to 6µg/mL (35). Taken together, these findings suggest that all three RND efflux  
310 pumps in *B. pseudomallei* can potentially efflux meropenem, although to what extent is  
311 not yet known. Alternately, they may regulate more than one RND efflux pump under  
312 certain conditions. The complex regulatory network controlling expression of these  
313 pumps is not yet well understood (36), and further work is needed to determine the  
314 precise roles of AmrR, BpeR and BpeT in the regulation of efflux pump expression in *B.*  
315 *pseudomallei*, including unraveling the mechanism underpinning the induction of AmrAB-  
316 OprA expression in the presence of meropenem. These questions are active areas of  
317 investigation in our laboratory.

318 Cross-resistance, a phenomenon whereby resistance towards one antibiotic can decrease  
319 susceptibility towards other antibiotics, has been described in many pathogenic bacterial  
320 species. One example is in methicillin-resistant *Staphylococcus aureus* (MRSA), an  
321 important cause of community- and hospital-acquired infections worldwide (37). The  
322 first-documented MRSA clones are thought to have become resistant to methicillin  
323 approximately 14 years before the first use of this antibiotic in clinical practice,

324 suggesting that resistance was not a consequence of methicillin-driven selection but  
325 rather first-generation  $\beta$ -lactam use (38). In this vein, it is noteworthy that Pre-DPMS 89  
326 and P337 harbored strains with reduced meropenem sensitivity yet were never treated  
327 with this drug, although they were both given doxycycline and P337 was also  
328 administered TMP/SMX (Text S1). These antibiotics are known substrates for at least one  
329 of the three *B. pseudomallei* RND efflux pumps (20, 26). In Pre-DPMS 89, the latter  
330 strain was doxycycline-resistant (MIC=48  $\mu$ g/mL), and in P337, decreased TMP/SMX  
331 susceptibility (3  $\mu$ g/mL) was seen (Table 1). Thus, we speculate that the increased  
332 doxycycline or TMP/SMX MICs led to cross-resistance towards meropenem in these  
333 cases. Interestingly, cross-resistance was not observed with imipenem, implying that  
334 these two carbapenems should be treated as separate drugs for the purposes of  
335 melioidosis treatment and isolate MIC testing; a substantial shift in current treatment  
336 dogma. The complex interplay of antibiotics and their cellular targets highlights the  
337 enigmatic role that multi-drug efflux systems can play in the development of antibiotic  
338 resistance in many bacterial pathogens, including *B. pseudomallei*. Further, our results  
339 show that resistance towards clinically relevant antibiotics can emerge during melioidosis  
340 treatment even when those antibiotics are not administered to the patient. A more  
341 intimate understanding of the mechanisms of cross-resistance in *B. pseudomallei* is  
342 needed to better identify and treat such mutants as they emerge under selection.

343 Current *B. pseudomallei* culture-based methodologies take between 24 and 72 hours for  
344 resistance determination, which can significantly delay the time in administering  
345 effective treatment (39). Predicting the resistance profile of a strain based on nucleic  
346 acid-based approaches is essential for the culture-independent detection of antibiotic  
347 resistance (40) and offers an attractive alternative to culture-based methods as a more  
348 rapid means for resistance detection. Due to the large number of mutations associated  
349 with decreased meropenem susceptibility, and the strong likelihood of novel mutations  
350 being uncovered that also contribute to this phenotype in other melioidosis cases,  
351 culture-independent platforms that can identify multiple mutations simultaneously will  
352 have the most impact and value in the clinical setting. Approaches such as portable,  
353 close-to-real-time next-generation sequencing of amplicons or whole bacterial genomes  
354 (e.g. Oxford Nanopore Technologies sequencing platforms (41)), or RT-qPCR assays that  
355 detect RND efflux pump upregulation, have the advantages of rapid turn-around-time,  
356 relatively low per-sample cost and broad target detection. We have preliminarily shown  
357 that *amrB* is dramatically upregulated (20-40-fold) in *amrR*-mutated *B. pseudomallei*  
358 strains that exhibit decreased meropenem susceptibility. Additional PCR assays targeting  
359 the BpeAB-OprB and BpeEF-OprC RND efflux pumps in *B. pseudomallei* may be useful in  
360 rapidly identifying *bpeR* and *bpeT* mutants, and we are currently evaluating a novel  
361 triplex RT-qPCR assay for this purpose (J. Webb *et al.*, manuscript in preparation).

362 Although the current study has identified and characterized mechanisms underpinning  
363 decreased meropenem susceptibility, there are still several unanswered questions that  
364 warrant further investigation. First, the precise clinical consequence of decreased  
365 meropenem susceptibility in *B. pseudomallei* is not yet clear. Our study focused on  
366 melioidosis cases that were persistently blood-culture positive, or that had recrudesced  
367 or relapsed, and excluded strains from acute, fatal infections or cases where eradication  
368 was achieved within the expected timeframe. It is possible that decreased meropenem  
369 susceptibility also occurs in these cases but remains undiagnosed. However, we deem  
370 this unlikely given that decreased meropenem susceptibility has only been identified on a  
371 handful of occasions despite extensive testing, suggesting that the decreased  
372 meropenem susceptibility phenotype is indeed correlated with poorer clinical response.  
373 Second, it is unclear whether the development of increased meropenem MICs would be  
374 grounds to exclude this drug as an available treatment option in all cases and indeed  
375 what alternative regimens may be appropriate. It is noteworthy that strains remained  
376 sensitive to imipenem despite efflux pump upregulation but co-resistance to ceftazidime,  
377 amoxicillin-clavulanate, doxycycline or TMP/SMX evolved in seven cases, suggesting that  
378 decreased susceptibility towards meropenem may be a risk factor for developing  
379 multidrug resistance due to synergism or cross-resistance.

## 380 **Conclusions**

381 The carbapenem antibiotic meropenem is one of the most important drugs in the  
382 treatment of severe melioidosis cases. Here, we describe 11 cases where decreased  
383 meropenem susceptibility developed over the course of infection, with nine of the 11  
384 patients having received meropenem as part of their treatment. Molecular  
385 characterization of all isolates exhibiting decreased meropenem susceptibility revealed  
386 several loss-of-function mutations leading to this phenotype, all of which up-regulated  
387 efflux pump expression, predominantly towards AmrAB-OprA, and to a lesser extent,  
388 BpeAB-OprB or BpeEF-OprC. Our study highlights the importance of treatment  
389 compliance and the need for early detection of emerging resistant populations.  
390 Continued assessment of treatment efficacy is essential for melioidosis management,  
391 especially in recrudescence or relapse cases, or when patients have difficulties clearing  
392 infection. Due to the large number of mutations leading to this phenotype, assays  
393 targeting efflux pump upregulation or rapid sequencing methods provide the most  
394 promising means of rapidly detecting emerging resistance.

395

396

## 397 **Materials and Methods**

398

399 **Ethics statement.** Ethics approval for this study has been approved as described  
400 elsewhere (5, 42).

401 **Clinical history and corresponding isolate description.** Individual patient histories  
402 are detailed in Text S1. Unless otherwise stated, patients were enrolled in the DPMS. All  
403 underwent prolonged antibiotic treatment, often with multiple, repeated courses of  
404 antibiotics. Some patients took their own leave from hospital during treatment and  
405 several did so on more than one occasion.

406 **Culture conditions, DNA isolation and WGS.** Unless stated otherwise, culture  
407 conditions, DNA extraction and WGS was performed as outlined previously (43).

408 **Meropenem MIC determination.** Meropenem MICs were determined using Etests  
409 (bioMérieux) according to manufacturer's instructions. The Clinical and Laboratory  
410 Standards Institute guidelines do not list MIC values for *B. pseudomallei* to meropenem,  
411 although there are guidelines for the related carbapenem antibiotic imipenem ( $\leq 4$ , 8 and  
412  $\geq 16$   $\mu\text{g/mL}$  for sensitive, intermediate and resistant, respectively). Based on our in-  
413 house testing of  $>100$  *B. pseudomallei* strains, we categorized decreased meropenem  
414 susceptibility as MICs  $\geq 3$   $\mu\text{g/mL}$ . Guidelines for resistance cut-offs for other antibiotics  
415 were used as published in the CLSI guidelines and were as follows: ceftazidime and  
416 doxycycline  $S \leq 4$ ,  $I = 8$  and  $R \geq 16$   $\mu\text{g/mL}$ , TMP/SMX  $S \leq 2/38$  and  $R \geq 4/76$   $\mu\text{g/mL}$ , and  
417 amoxicillin-clavulanate  $S \leq 8/4$ ,  $I = 16/8$  and  $R \geq 32/16$   $\mu\text{g/mL}$ .

418 **Reference genome assembly.** The genomes of initial (meropenem-sensitive; MICs  $< 2$   
419  $\mu\text{g/mL}$ ) and latter (decreased susceptibility; MICs  $\geq 3$   $\mu\text{g/mL}$ ) isolates from P608, P726  
420 and P797 have previously been assembled to closure or near-closure using a  
421 combination of PacBio and Illumina data (21). These high-quality isogenic genomes were  
422 used to identify the molecular basis of decreased meropenem susceptibility. For other  
423 patients, only Illumina data were generated. Additional reference genomes were  
424 assembled to improved draft quality using MGAP v0.0.1  
425 (<https://github.com/dsarov/MGAP---Microbial-Genome-Assembler-Pipeline>).

426 **Identification of molecular targets conferring decreased meropenem**  
427 **susceptibility.** Comparative genomic analysis was performed using SPANDx v3.1.2 (44)  
428 to identify single-nucleotide polymorphisms (SNPs), small insertions/deletions (indels),  
429 large deletions and gene duplications between sensitive and decreased susceptibility  
430 isolates. SPANDx wraps Burrows Wheeler Aligner (45), SAMTools (45), the Genome

431 Analysis Toolkit (GATK) (46), BEDTools (47) and SnpEff (48) into a single pipeline for  
432 ease-of-use and standardized outputs. The initial isolate from each patient was used as  
433 the reference genome for comparative genomic analysis; where this strain was  
434 unavailable, *B. pseudomallei* K96243 (49) was used for read mapping and variant  
435 annotation. Sequential isolates from the same patient were screened for rearrangements  
436 using Mauve v2.4.0 (50).

437 **Knockouts and complementation.** *B. pseudomallei* scar-less gene knockouts were  
438 created using previously published methods (23). Primers used for vector construction  
439 and validation of *amrR* knockouts are described elsewhere (26). RT-qPCR of *amrB*  
440 expression was performed as previously detailed (26), with modifications. Primers and  
441 probe were redesigned and are as follows; *amrB*\_forward 5'-TGTTTCGCATGGGTGATCTCC-  
442 3', *amrB*\_reverse 5'-GACCGATTCTCGACGACCT-3' and *amrB*\_probe 5'FAM-  
443 TGTTTCATCATGCTGGGCGGCATC-3' BHQ-1. Additionally, no pre-amplification of nucleic  
444 acid was required for detection and quantification. To measure the role of induction on  
445 *amrAB-oprA* expression, meropenem was included at the sub-inhibitory concentration of  
446 0.25 µg/mL.

447 **Data availability.** All WGS data is available under the following NCBI BioProject  
448 accession numbers: PRJNA272882, PRJNA300580, PRJNA393909, PRJNA397943 and  
449 PRJNA412120.

#### 450 **Acknowledgements**

451 We thank Vanessa Rigas and Barbara MacHunter (Menzies School of Health Research)  
452 for laboratory assistance, and the Pathology Department at Royal Darwin Hospital for  
453 sample collection. This work was funded by the National Health and Medical Research  
454 Council via awards 1046812 and 1098337. DSS is supported by an Advance Queensland  
455 Fellowship and EPP is supported by a University of the Sunshine Coast Fellowship.

456

457

458 **Tables**

459 **Table 1: Minimum inhibitory concentration data for the *Burkholderia***  
 460 ***pseudomallei* isolates examined in this study.**

| Patient           | Strain                        | MP   | TZ   | TMP/SMX <sup>a</sup> | AMC | DOX  |
|-------------------|-------------------------------|------|------|----------------------|-----|------|
| Pre-DPMS<br>89    | MSHR0052                      | 8    | 1.5  | 0.125                | 3   | 48   |
| P179              | MSHR0492                      | 1.5  | 1.5  | 1                    | 1.5 | 1    |
|                   | MSHR0535                      | 1.5  | 1.5  | 1                    | 3   | 4    |
|                   | MSHR0647                      | 1.5  | 1.5  | ND                   | 3   | 1    |
|                   | MSHR0678                      | 3    | 2    | 2                    | 3   | 2    |
|                   | MSHR0800                      | 6    | 3    | 0.38                 | ND  | 8    |
|                   | MSHR0934                      | 0.75 | 2    | 1                    | 2   | 1    |
| P215              | MSHR0664                      | 1.5  | 0.75 | 2                    | 1.5 | ND   |
|                   | MSHR0937                      | 6    | 8    | 3                    | 12  | 4    |
| P337 <sup>b</sup> | MSHR1141                      | 0.75 | 1.5  | 0.75                 | 1.5 | 1    |
|                   | MSHR1300                      | 4    | >256 | 3                    | 1   | 3    |
| P608              | MSHR3763                      | 0.75 | 2    | 3                    | 4   | 0.75 |
|                   | MSHR4083                      | 6    | 2    | 24                   | 4   | 1    |
|                   | MSHR4083 $\Delta$ <i>amrR</i> | 3    | ND   | ND                   | ND  | ND   |
| P726              | MSHR5864                      | 0.75 | 1.5  | 1.5                  | 3   | 1    |
|                   | MSHR5864 $\Delta$ <i>amrR</i> | 3    | ND   | ND                   | ND  | ND   |
|                   | MSHR6755                      | 3    | 1.5  | 0.75                 | 2   | 1.5  |
|                   | MSHR6755 $\Delta$ <i>amrR</i> | 3    | ND   | ND                   | ND  | ND   |
| P797              | MSHR6522                      | 0.5  | 1.5  | 1.5                  | 2   | 1    |
|                   | MSHR7587                      | 3    | 1.5  | 1.5                  | 1.5 | 1    |
|                   | MSHR7929                      | 4    | 1.5  | 4                    | 2   | 2    |
| P989              | MSHR9021                      | 3    | 1.5  | 0.38                 | ND  | 3    |
|                   | MSHR9039                      | 0.75 | 1.5  | 0.75                 | ND  | 2    |
| QP09 <sup>c</sup> | MSHR8544                      | 0.75 | S    | S                    | S   | ND   |
|                   | MSHR8481                      | 6    | S    | S                    | S   | ND   |
| CF9 <sup>d</sup>  | MSHR5662                      | 0.75 | 2    | 0.5                  | 2   | 2    |
|                   | MSHR5667                      | 4    | 2    | $\geq 32$            | 1.5 | 48   |
| CF11 <sup>d</sup> | MSHR8441                      | 2    | 12   | $\geq 32$            | 4   | 4    |
|                   | MSHR8442                      | 3    | 2    | $\geq 32$            | 2   | 8    |



461 Abbreviations: MP, meropenem; TZ, ceftazidime; TMP/SMX, trimethoprim-  
 462 sulfamethoxazole; AMC, amoxicillin-clavulanate; DOX, doxycycline; GM, gentamicin;  
 463 DPMS, Darwin Prospective Melioidosis Study; ND, not determined.  
 464 <sup>a</sup>Values reported for TMP/SMX are indicative of TMP concentration.  
 465 <sup>b</sup>From (12).  
 466 <sup>c</sup>Antibiotic sensitivity testing (excluding meropenem) for this patient was performed  
 467 using the Vitek 2 system.  
 468 <sup>d</sup>From (14).  
 469 Values are in µg/mL. Light gray shading, decreased susceptibility/intermediate  
 470 resistance; dark gray shading, resistance.

471 **Table 2: Efflux pump regulator variants identified in Burkholderia pseudomallei isolates exhibiting**  
 472 **decreased meropenem susceptibility.**

| Patient       | Strain   | AmrR<br>( <i>BPSL1805</i> ) | BpeR<br>( <i>BPSL0812</i> ) | BpeT<br>( <i>BPSS0290</i> ) |
|---------------|----------|-----------------------------|-----------------------------|-----------------------------|
| Pre-DPMS P89  | MSHR0052 | Q190 <sup>a</sup>           | WT                          | WT                          |
| P179          | MSHR0678 | Q21D                        | WT                          | WT                          |
|               | MSHR0800 | WT                          | L85fs                       | WT                          |
| P215          | MSHR0937 | WT                          | D176A                       | WT                          |
| P337          | MSHR1300 | K13fs <sup>b</sup>          | WT                          | S311R                       |
| P608          | MSHR4083 | A153_D156del <sup>c</sup>   | WT                          | WT                          |
| P726          | MSHR6755 | V60_C63del <sup>c</sup>     | WT                          | WT                          |
| P797          | MSHR7587 | G30D                        | WT                          | WT                          |
|               | MSHR7929 | G30D                        | WT                          | WT                          |
| P989*         | MSHR9021 | S166P; A145fs <sup>d</sup>  | WT                          | WT                          |
| Non DPMS QP09 | MSHR8481 | V71fs <sup>f</sup>          | WT                          | WT                          |
| CF9           | MSHR5667 | L132P                       | WT                          | WT                          |
| CF11          | MSHR8441 | V62fs <sup>e</sup>          | WT                          | WT                          |
|               | MSHR8442 | V62fs <sup>e</sup>          | WT                          | WT                          |

473 Abbreviations: del, deletion; WT, wild-type; fs, frameshift  
 474 \*Isolates from this patient were intentionally sequenced from a potentially mixed population to  
 475 capture population diversity. For MSHR9021, two AmrR mutants, S166P and A145fs, at ratios of  
 476 ~66% and 33%, respectively (Figure S3). No AmrR mutants or mixtures were observed in the initial  
 477 strain from this patient.  
 478 <sup>a</sup>Frameshift indel increases protein length from 223 to 288 residues  
 479 <sup>b</sup>Frameshift indel shortens protein length from 223 to 185 residues  
 480 <sup>c</sup>In-frame indel shortens protein length from 223 to 219 residues  
 481 <sup>d</sup>Frameshift indel shortens protein length from 223 to 183 residues  
 482 <sup>e</sup>Frameshift indel increases protein length from 223 to 285 residues  
 483 <sup>f</sup>Frameshift indel shortens protein length from 223 to 117 residues  
 484

485 References

- 486 1. Wiersinga WJ, Currie BJ, & Peacock SJ (2012) Melioidosis. *N Engl J Med* 367(11):1035-1044.
- 487 2. Lipsitz R, et al. (2012) Workshop on treatment of and postexposure prophylaxis for
- 488 *Burkholderia pseudomallei* and *B. mallei* infection, 2010. *Emerg Infect Dis* 18(12):e2.
- 489 3. Dance DA (2014) Treatment and prophylaxis of melioidosis. *Int J Antimicrob Agents*
- 490 43(4):310-318.
- 491 4. Limmathurotsakul D, et al. (2010) Increasing incidence of human melioidosis in Northeast
- 492 Thailand. *Am J Trop Med Hyg* 82(6):1113-1117.
- 493 5. Currie BJ, Ward L, & Cheng AC (2010) The epidemiology and clinical spectrum of melioidosis:
- 494 540 cases from the 20 year Darwin prospective study. *PLoS Negl Trop Dis* 4(11):e900.
- 495 6. Parameswaran U, Baird RW, Ward LM, & Currie BJ (2012) Melioidosis at Royal Darwin
- 496 Hospital in the big 2009-2010 wet season: comparison with the preceding 20 years. *Med J*
- 497 *Aust* 196(5):345-348.
- 498 7. Limmathurotsakul D, et al. (2016) Predicted global distribution of *Burkholderia pseudomallei*
- 499 and burden of melioidosis. *Nat Microbiol* 1:15008.
- 500 8. Smith MD, Wuthiekanun V, Walsh AL, & White NJ (1994) Susceptibility of *Pseudomonas*
- 501 *pseudomallei* to some newer beta-lactam antibiotics and antibiotic combinations using time-
- 502 kill studies. *J Antimicrob Chemother* 33(1):145-149.
- 503 9. Smith MD, Wuthiekanun V, Walsh AL, & White NJ (1996) In-vitro activity of carbapenem
- 504 antibiotics against beta-lactam susceptible and resistant strains of *Burkholderia*
- 505 *pseudomallei*. *J Antimicrob Chemother* 37(3):611-615.
- 506 10. Schweizer HP (2012) Mechanisms of antibiotic resistance in *Burkholderia pseudomallei*:
- 507 implications for treatment of melioidosis. *Future Microbiol* 7(12):1389-1399.
- 508 11. Sarovich DS, et al. (2012) Development of ceftazidime resistance in an acute *Burkholderia*
- 509 *pseudomallei* infection. *Infect Drug Resist* 5:129-132.
- 510 12. Sarovich DS, et al. (2012) Characterization of ceftazidime resistance mechanisms in clinical
- 511 isolates of *Burkholderia pseudomallei* from Australia. *PLoS One* 7(2):e30789.
- 512 13. Rholl DA, et al. (2011) Molecular investigations of PenA-mediated beta-lactam resistance in
- 513 *Burkholderia pseudomallei*. *Front Microbiol* 2:139.
- 514 14. Viberg LT, et al. (2017) Within-host evolution of *Burkholderia pseudomallei* during chronic
- 515 infection of seven Australasian cystic fibrosis patients. *MBio* 8(2).
- 516 15. Tribuddharat C, Moore RA, Baker P, & Woods DE (2003) *Burkholderia pseudomallei* class a
- 517 beta-lactamase mutations that confer selective resistance against ceftazidime or clavulanic
- 518 acid inhibition. *Antimicrob Agents Chemother* 47(7):2082-2087.
- 519 16. Sam IC, See KH, & Puthuchery SD (2009) Variations in ceftazidime and amoxicillin-
- 520 clavulanate susceptibilities within a clonal infection of *Burkholderia pseudomallei*. *J Clin*
- 521 *Microbiol* 47(5):1556-1558.
- 522 17. Chantratita N, et al. (2011) Antimicrobial resistance to ceftazidime involving loss of
- 523 penicillin-binding protein 3 in *Burkholderia pseudomallei*. *Proc Natl Acad Sci U S A*
- 524 108(41):17165-17170.
- 525 18. Bugrysheva JV, et al. (2017) Antibiotic resistance markers in strain Bp1651 of *Burkholderia*
- 526 *pseudomallei* identified by genome sequence analysis. *Antimicrob Agents Chemother*.
- 527 19. Podnecky NL (2013) Folate pathway inhibitor resistance mechanisms in *Burkholderia*
- 528 *pseudomallei*. PhD (Colorado State University, Fort Collins, CO).
- 529 20. Podnecky NL, et al. (2017) Mechanisms of resistance to folate pathway inhibitors in
- 530 *Burkholderia pseudomallei*: deviation from the norm. *mBio*.
- 531 21. Price EP, et al. (2017) Whole-genome sequences of *Burkholderia pseudomallei* isolates
- 532 exhibiting decreased meropenem susceptibility. *Genome Announc* 5(14).
- 533 22. Moore RA, DeShazer D, Reckseidler S, Weissman A, & Woods DE (1999) Efflux-mediated
- 534 aminoglycoside and macrolide resistance in *Burkholderia pseudomallei*. *Antimicrob Agents*
- 535 *Chemother* 43(3):465-470.

- 536 23. Hamad MA, Zajdowicz SL, Holmes RK, & Voskuil MI (2009) An allelic exchange system for  
537 compliant genetic manipulation of the select agents *Burkholderia pseudomallei* and  
538 *Burkholderia mallei*. *Gene* 430(1-2):123-131.
- 539 24. Crowe A, McMahon N, Currie BJ, & Baird RW (2014) Current antimicrobial susceptibility of  
540 first-episode melioidosis *Burkholderia pseudomallei* isolates from the Northern Territory,  
541 Australia. *Int J Antimicrob Agents* 44(2):160-162.
- 542 25. Pitman MC, et al. (2015) Intravenous therapy duration and outcomes in melioidosis: a new  
543 treatment paradigm. *PLoS Negl Trop Dis* 9(3):e0003586.
- 544 26. Webb JR, Price EP, Currie BJ, & Sarovich DS (2017) Loss of methyltransferase function and  
545 increased efflux activity leads to doxycycline resistance in *Burkholderia pseudomallei*.  
546 *Antimicrob Agents Chemother*.
- 547 27. Cashel M (1975) Regulation of bacterial ppGpp and pppGpp. *Annu Rev Microbiol* 29:301-318.
- 548 28. Cheng AC, et al. (2004) Outcomes of patients with melioidosis treated with meropenem.  
549 *Antimicrob Agents Chemother* 48(5):1763-1765.
- 550 29. Currie BJ (2015) Melioidosis: evolving concepts in epidemiology, pathogenesis, and  
551 treatment. *Semin Respir Crit Care Med* 36(1):111-125.
- 552 30. Masuda N & Ohya S (1992) Cross-resistance to meropenem, cepheims, and quinolones in  
553 *Pseudomonas aeruginosa*. *Antimicrob Agents Chemother* 36(9):1847-1851.
- 554 31. Kohler T, Michea-Hamzehpour M, Epp SF, & Pechere JC (1999) Carbapenem activities against  
555 *Pseudomonas aeruginosa*: respective contributions of OprD and efflux systems. *Antimicrob*  
556 *Agents Chemother* 43(2):424-427.
- 557 32. Giske CG, Buaro L, Sundsfjord A, & Wretling B (2008) Alterations of porin, pumps, and  
558 penicillin-binding proteins in carbapenem resistant clinical isolates of *Pseudomonas*  
559 *aeruginosa*. *Microb Drug Resist* 14(1):23-30.
- 560 33. Peleg AY, Adams J, & Paterson DL (2007) Tigecycline efflux as a mechanism for  
561 nonsusceptibility in *Acinetobacter baumannii*. *Antimicrob Agents Chemother* 51(6):2065-  
562 2069.
- 563 34. Higgins PG, Wisplinghoff H, Stefanik D, & Seifert H (2004) Selection of topoisomerase  
564 mutations and overexpression of *adeB* mRNA transcripts during an outbreak of  
565 *Acinetobacter baumannii*. *J Antimicrob Chemother* 54(4):821-823.
- 566 35. Hayden HS, et al. (2012) Evolution of *Burkholderia pseudomallei* in recurrent melioidosis.  
567 *PLoS One* 7(5):e36507.
- 568 36. Podnecky NL, et al. (2017) Mechanisms of resistance to folate pathway inhibitors in  
569 *Burkholderia pseudomallei*: deviation from the norm. *MBio* 8(5).
- 570 37. Tong SY, Davis JS, Eichenberger E, Holland TL, & Fowler VG, Jr. (2015) *Staphylococcus aureus*  
571 infections: epidemiology, pathophysiology, clinical manifestations, and management. *Clin*  
572 *Microbiol Rev* 28(3):603-661.
- 573 38. Harkins CP, et al. (2017) Methicillin-resistant *Staphylococcus aureus* emerged long before  
574 the introduction of methicillin into clinical practice. *Genome Biol* 18(1):130.
- 575 39. Jenkins SG & Schuetz AN (2012) Current concepts in laboratory testing to guide antimicrobial  
576 therapy. *Mayo Clin Proc* 87(3):290-308.
- 577 40. Koser CU, Ellington MJ, & Peacock SJ (2014) Whole-genome sequencing to control  
578 antimicrobial resistance. *Trends Genet* 30(9):401-407.
- 579 41. Branton D, et al. (2008) The potential and challenges of nanopore sequencing. *Nat*  
580 *Biotechnol* 26(10):1146-1153.
- 581 42. Geake JB, et al. (2015) An international, multicentre evaluation and description of  
582 *Burkholderia pseudomallei* infection in cystic fibrosis. *BMC Pulm Med* 15:116.
- 583 43. Price EP, et al. (2016) Unprecedented melioidosis cases in northern Australia caused by an  
584 Asian *Burkholderia pseudomallei* strain identified by using large-scale comparative genomics.  
585 *Appl Environ Microbiol* 82(3):954-963.

- 586 44. Sarovich DS & Price EP (2014) SPANDx: a genomics pipeline for comparative analysis of large  
587 haploid whole genome re-sequencing datasets. *BMC Res Notes* 7:618.
- 588 45. Li H & Durbin R (2009) Fast and accurate short read alignment with Burrows-Wheeler  
589 transform. *Bioinformatics* 25(14):1754-1760.
- 590 46. McKenna A, *et al.* (2010) The Genome Analysis Toolkit: a MapReduce framework for  
591 analyzing next-generation DNA sequencing data. *Genome Res* 20(9):1297-1303.
- 592 47. Quinlan AR & Hall IM (2010) BEDTools: a flexible suite of utilities for comparing genomic  
593 features. *Bioinformatics* 26(6):841-842.
- 594 48. Cingolani P, *et al.* (2012) A program for annotating and predicting the effects of single  
595 nucleotide polymorphisms, SnpEff: SNPs in the genome of *Drosophila melanogaster* strain  
596 w1118; iso-2; iso-3. *Fly (Austin)* 6(2):80-92.
- 597 49. Holden MT, *et al.* (2004) Genomic plasticity of the causative agent of melioidosis,  
598 *Burkholderia pseudomallei*. *Proc Natl Acad Sci U S A* 101(39):14240-14245.
- 599 50. Darling AC, Mau B, Blattner FR, & Perna NT (2004) Mauve: multiple alignment of conserved  
600 genomic sequence with rearrangements. *Genome Res* 14(7):1394-1403.
- 601

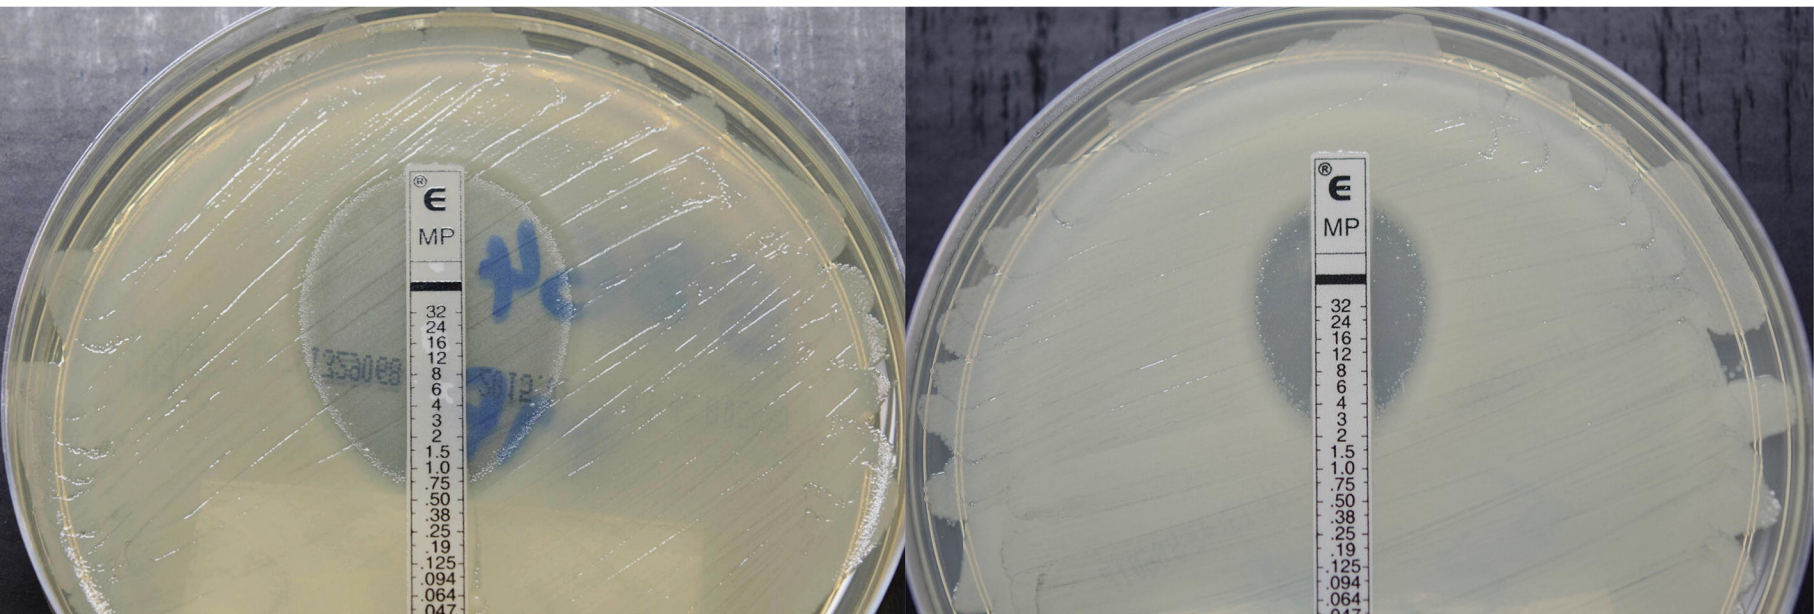

Figure 1: Representative meropenem Etest of a wild-type *B. pseudomallei* strain with a minimum inhibitory concentration (MIC) value of 0.75 µg/mL (left), compared to a strain that has developed reduced meropenem susceptibility with an MIC value of 3 µg/mL (right).

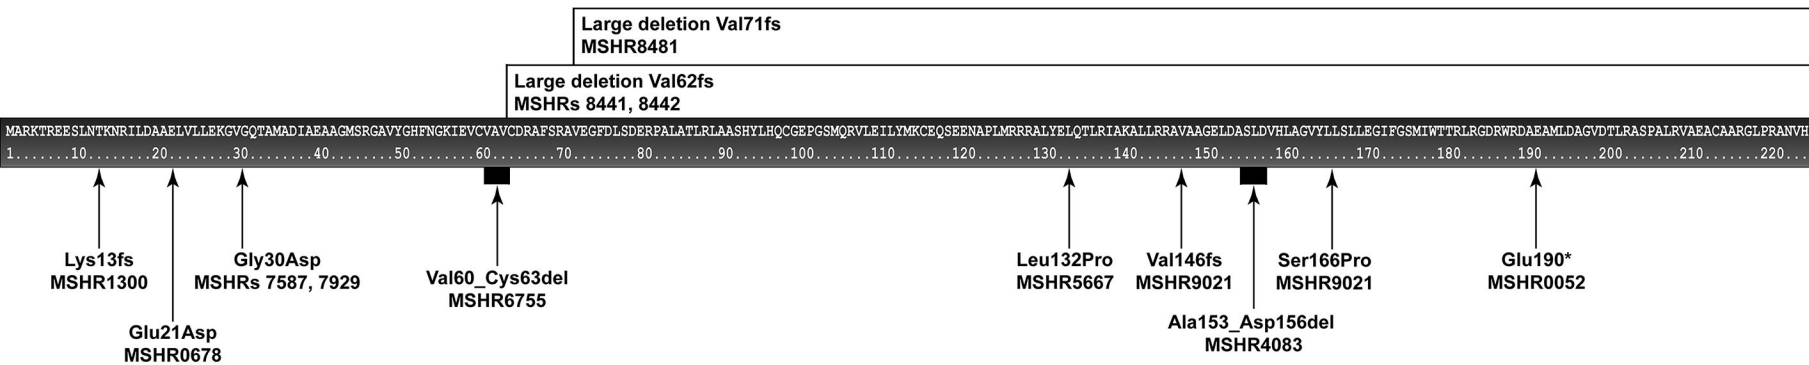

Figure 2: Distribution and annotation of mutations occurring within *amrR*. *Burkholderia pseudomallei* strains with decreased meropenem susceptibility usually harbor mutations in *amrR*, the regulator of the AmrAB-OprA resistance-nodulation-division efflux pump. Eleven distinct mutations were observed in *amrR*, with all mutations leading to a decrease in meropenem susceptibility. No overlap of mutations was observed for any of the strains, demonstrating that there are many possible mutations capable of inactivating or impairing AmrR function.
